# Supplementary material for: Ionic plastic crystals and ionic liquids containing quaternary cations with alkenyl substituents: chemical phase transformations by bromine vapor
Source: Royal Society of Chemistry journal article supplement (doi:10.1039/d3nj05633c), 2024-01-01
Supplement: d3nj05633c1.pdf [file d3nj05633c1.pdf]

## Supporting Information

### **Ionic Plastic Crystals and Ionic Liquids Containing Quaternary Cations with Alkenyl Substituents: Chemical Phase Transformations by Bromine Vapor**

Yosuke Nakazono,<sup>a</sup> Ryota Inoue,<sup>a</sup> Ryo Sumitani,<sup>a</sup> and Tomoyuki Mochida<sup>\*a,b</sup>

<sup>a</sup>*Department of Chemistry, Graduate School of Science, Kobe University, Rokkodai, Nada, Kobe, Hyogo 657-8501, Japan. E-mail: tmochida@platinum.kobe-u.ac.jp*

<sup>b</sup>*Research Center for Membrane and Film Technology, Kobe University, Rokkodai, Nada, Kobe, Hyogo 657-8501, Japan*

#### **Contents**

**Fig. S1.** DSA traces of [1]X–[3]X, where X = CPFSA, or CF<sub>3</sub>BF<sub>3</sub>.

**Fig. S2.** Packing diagrams of (a) [2]CPFSA and (b) [1-Br]CPFSA at 90 K.

**Fig. S3.** DSC traces of [1-Br]X–[3-Br]X, where X = CPFSA or CF<sub>3</sub>BF<sub>3</sub>.

**Fig. S4.** TG traces of [1]X–[3]X and [1-Br]X–[3-Br]X, where X = CPFSA or CF<sub>3</sub>BF<sub>3</sub>.

**Fig. S5.** <sup>1</sup>H NMR spectra of [1]X–[3]X and [1-Br]X–[3-Br]X, where X = CPFSA or CF<sub>3</sub>BF<sub>3</sub>.

**Table S1.** Cell parameters

**Table S2.** Crystallographic parameters

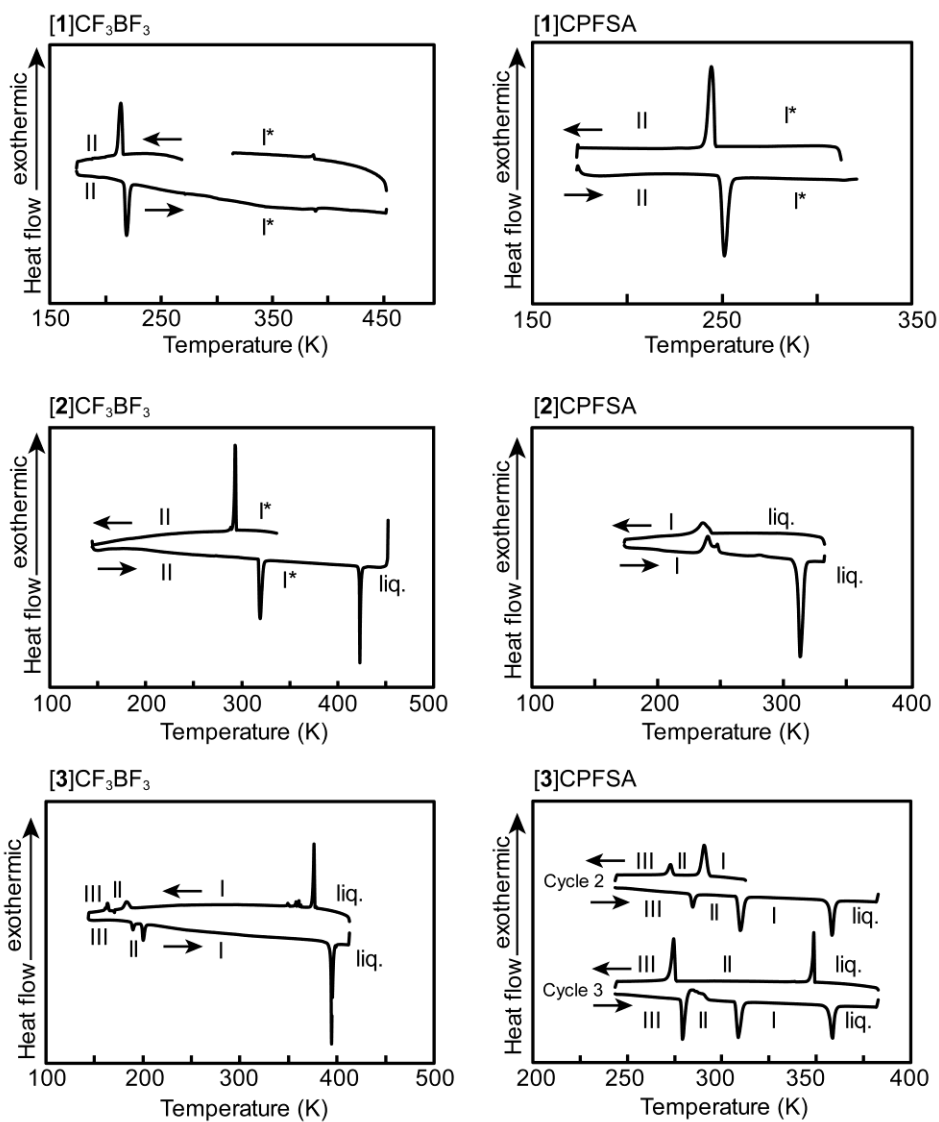

**Fig. S1.** DSA traces of [1]X–[3]X, where X = CPFSA or  $\text{CF}_3\text{BF}_3$ .

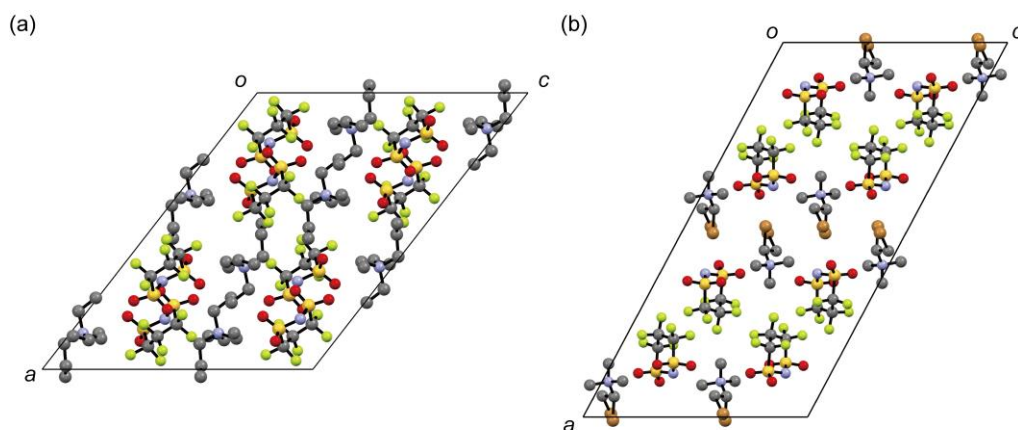

**Fig. S2.** Packing diagrams of (a) [2]CPFSA and (b) [1-Br]CPFSA at 90 K. Hydrogen atoms have been omitted.

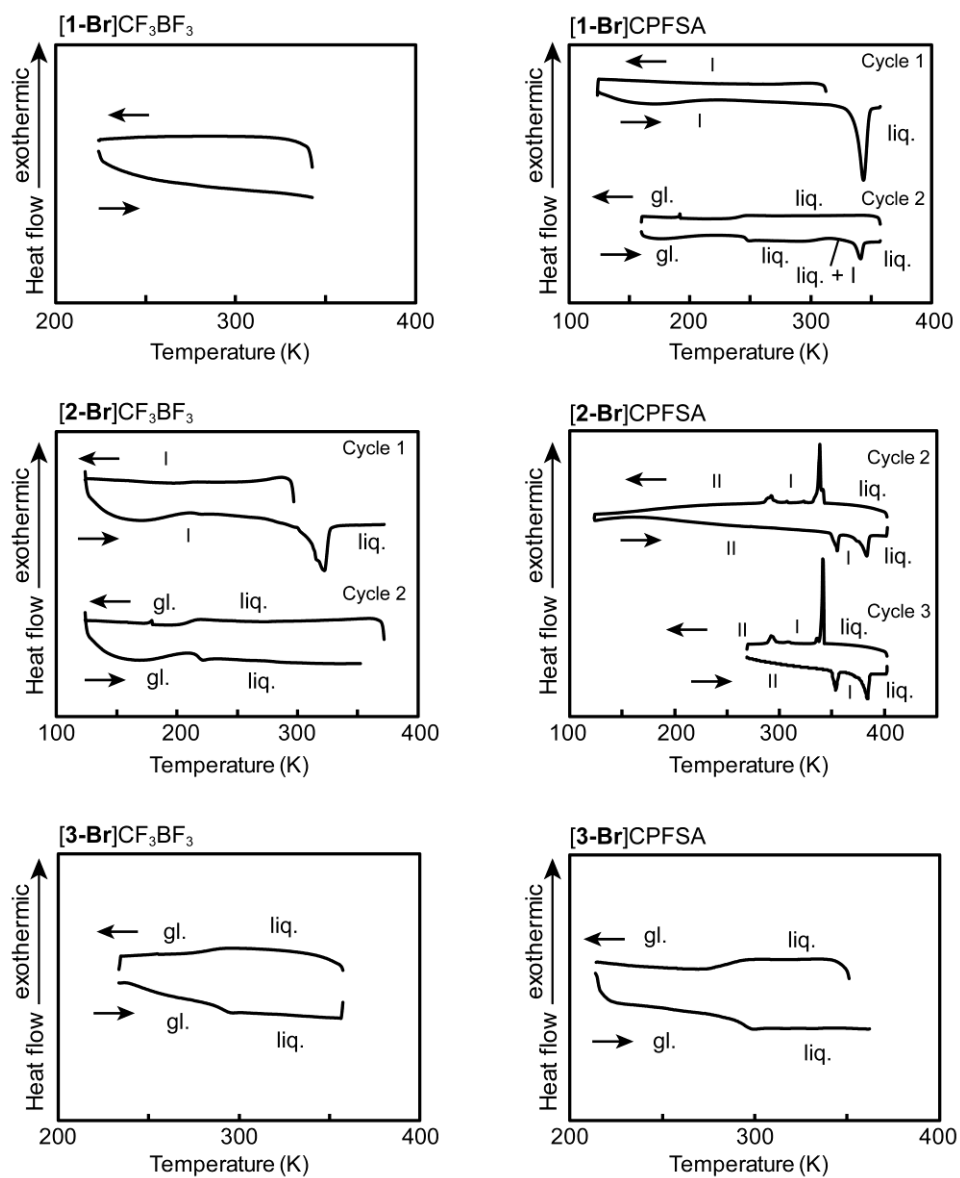

**Fig. S3.** DSC traces of  $[1-Br]X$ – $[3-Br]X$ , where  $X = CPFSA$  or  $CF_3BF_3$ , and liq. and gl. are the liquid and glassy states, respectively.

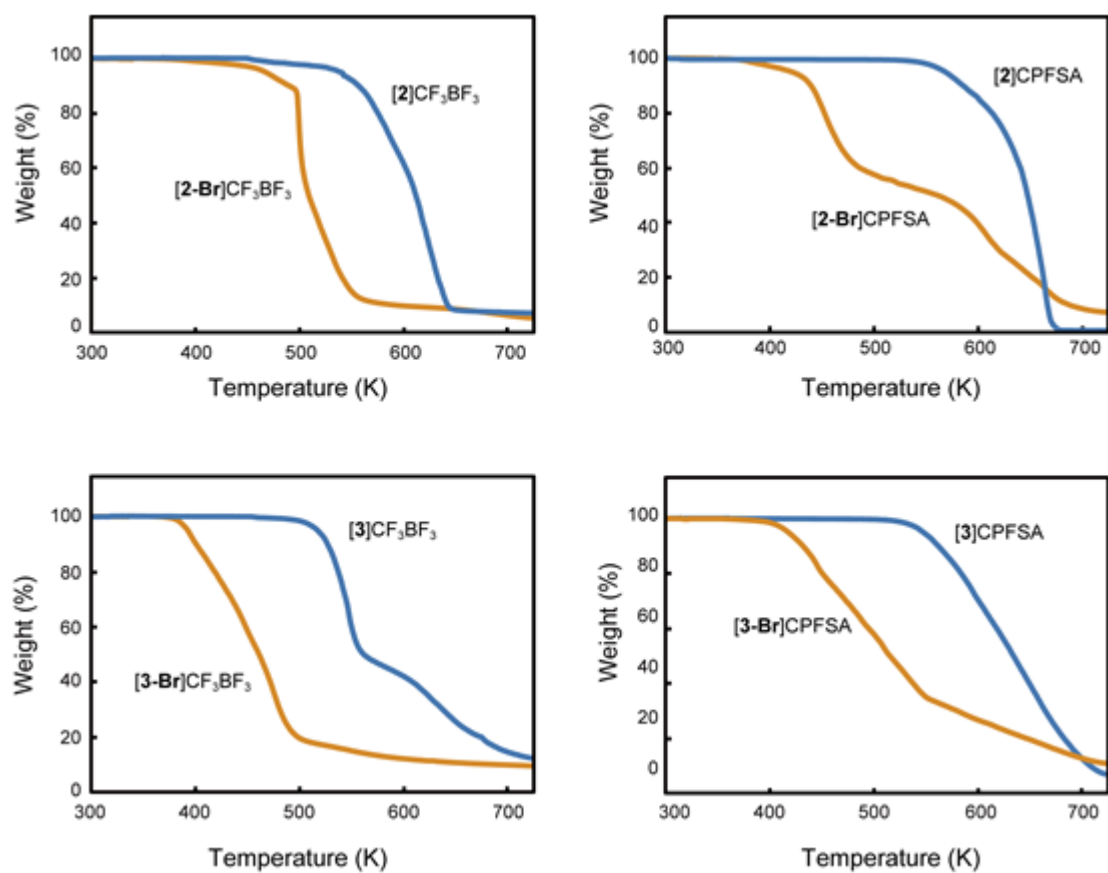

**Fig. S4.** TG traces of [1]X–[3]X and [1-Br]X–[3-Br]X, where X = CPFSA or CF<sub>3</sub>BF<sub>3</sub> at 3 K min<sup>-1</sup> under a nitrogen atmosphere.

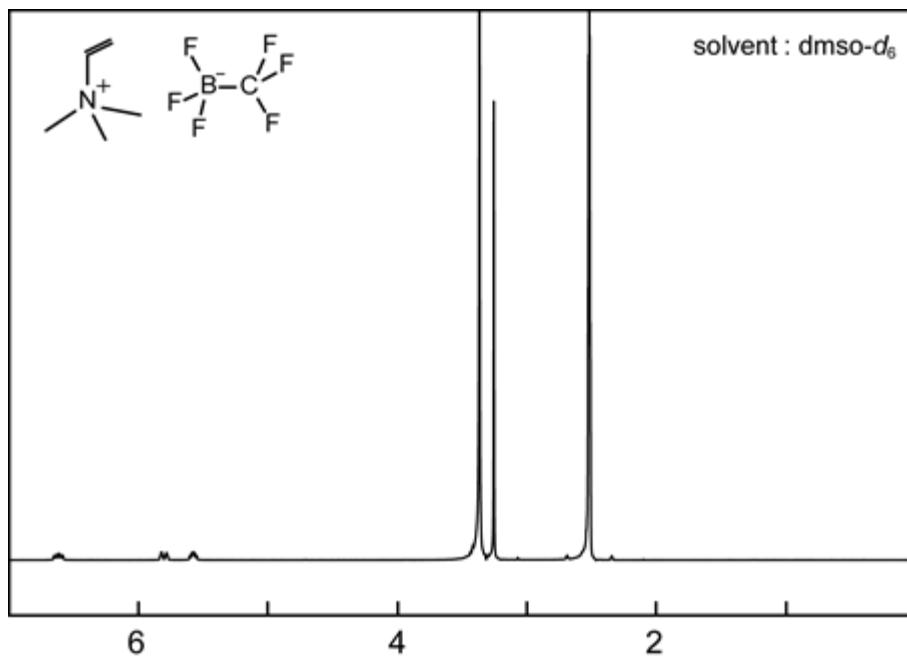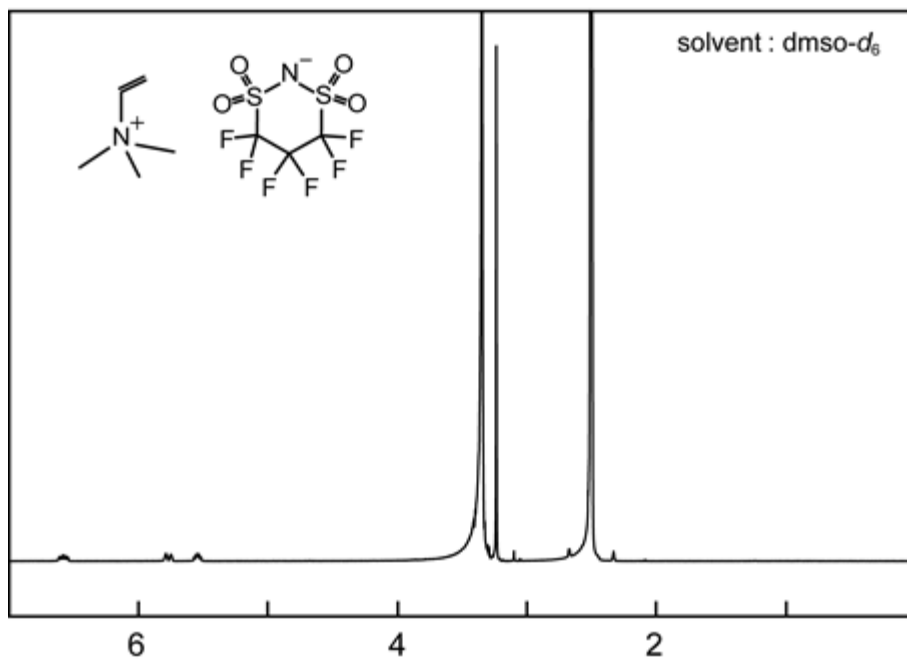

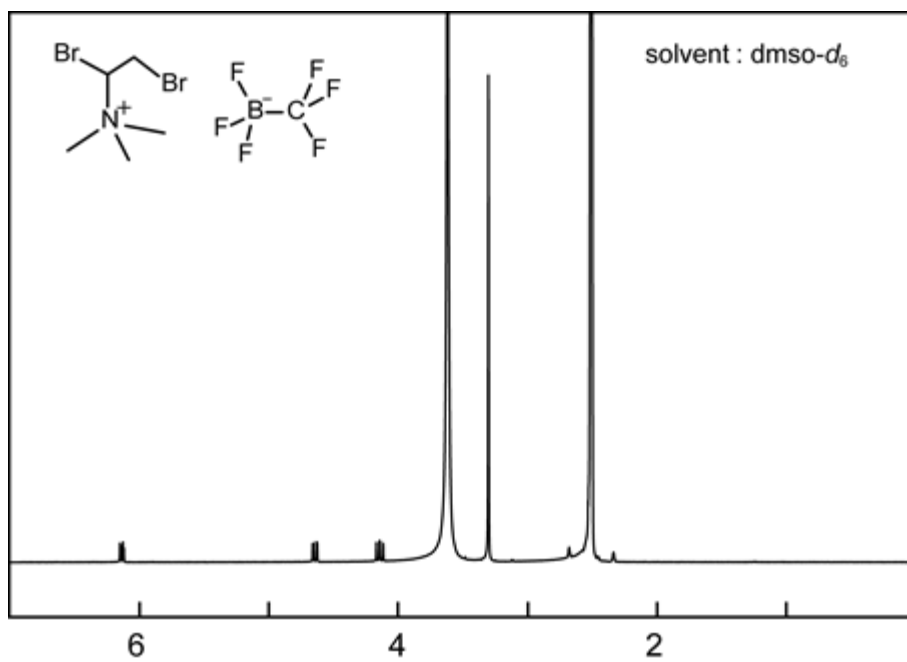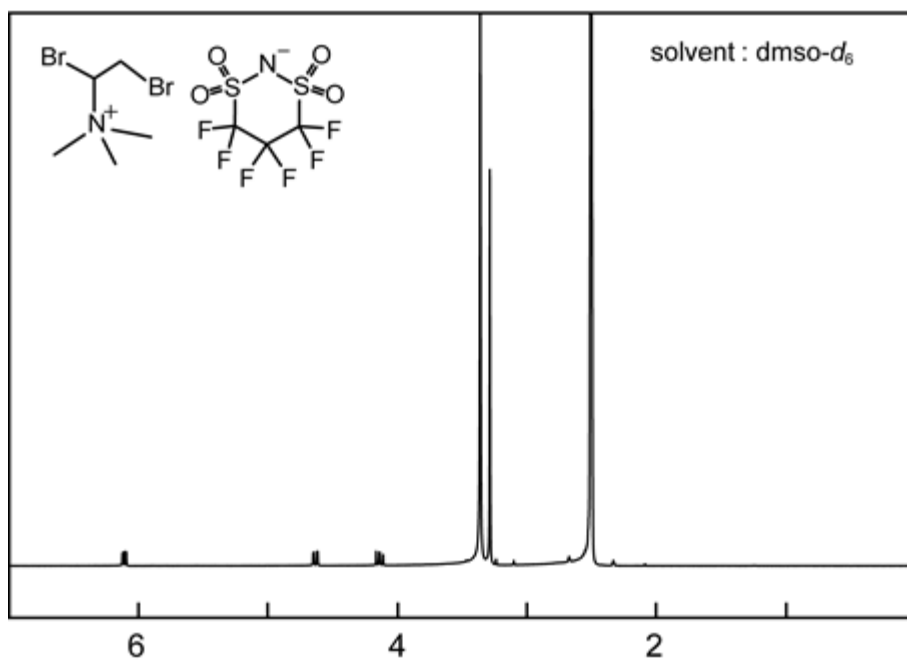

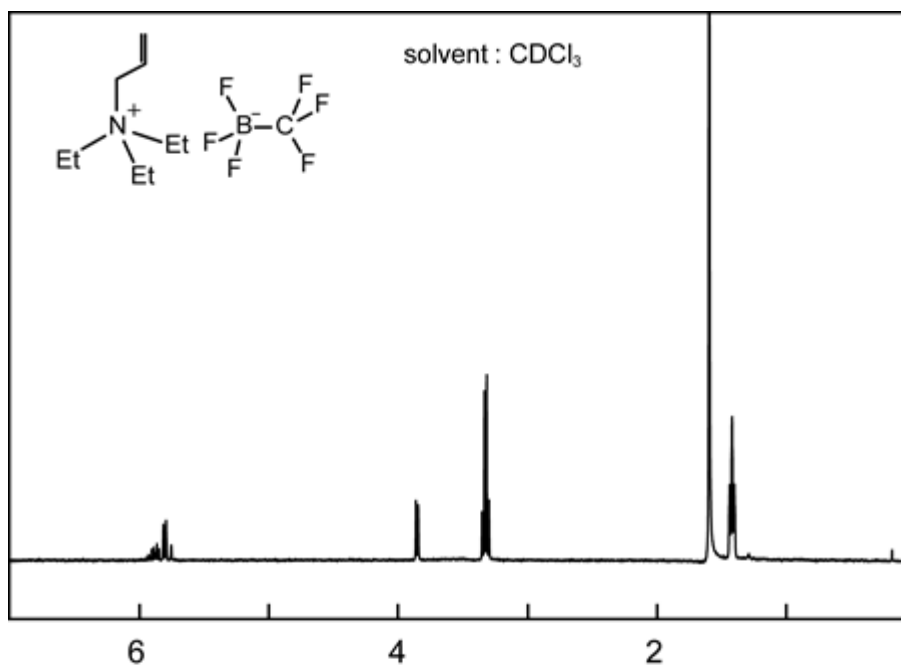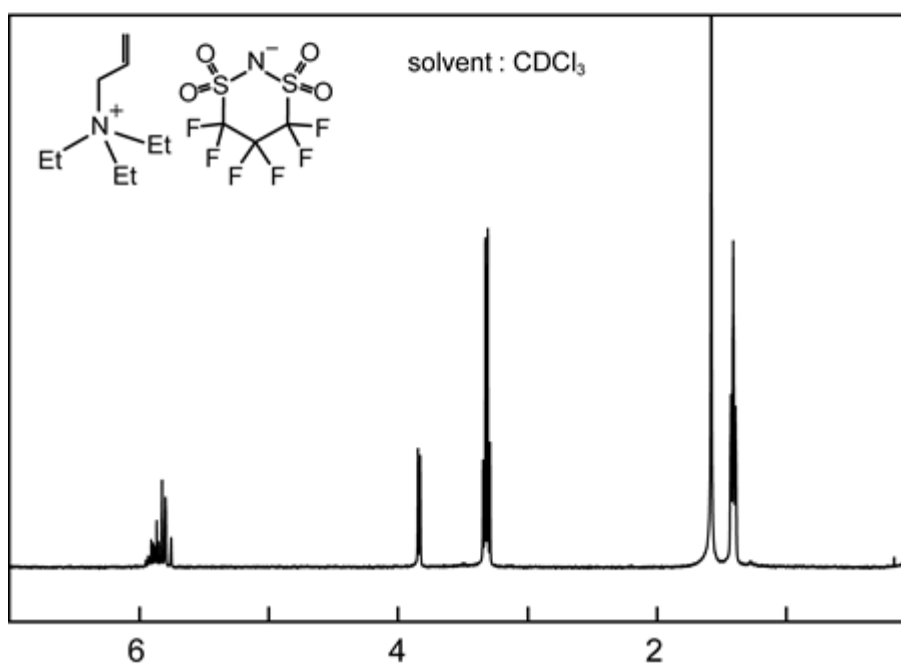

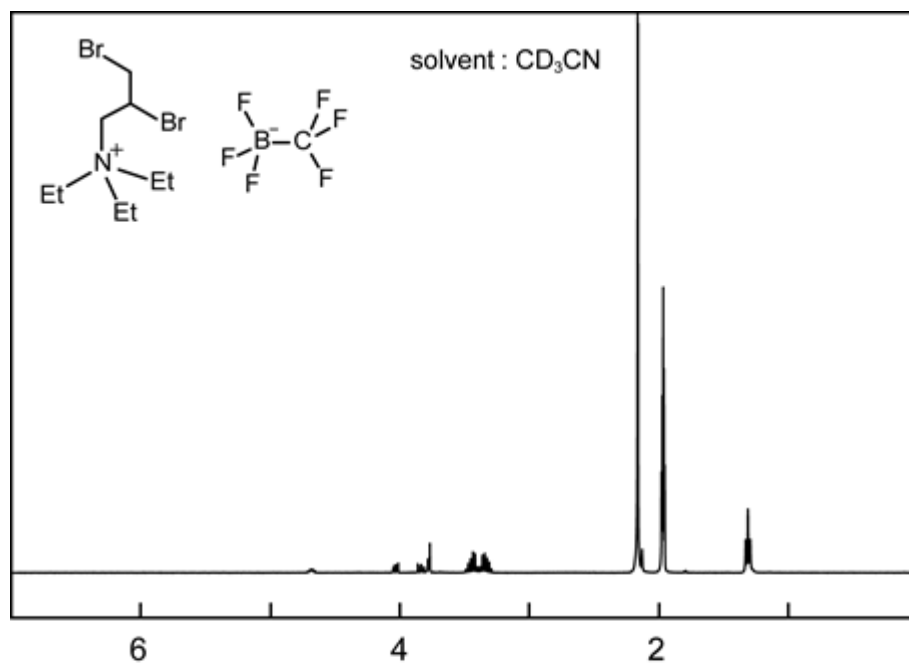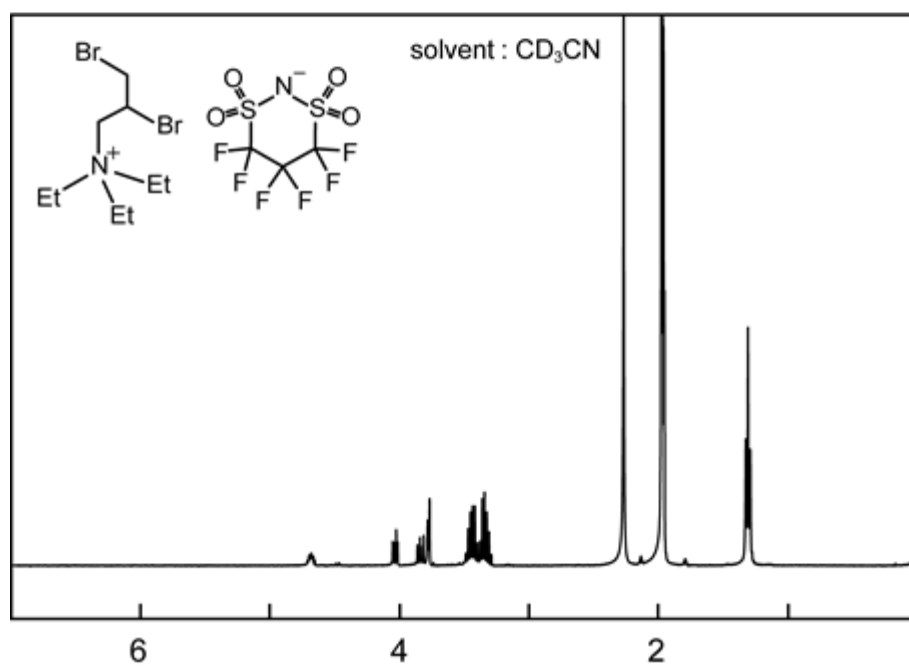



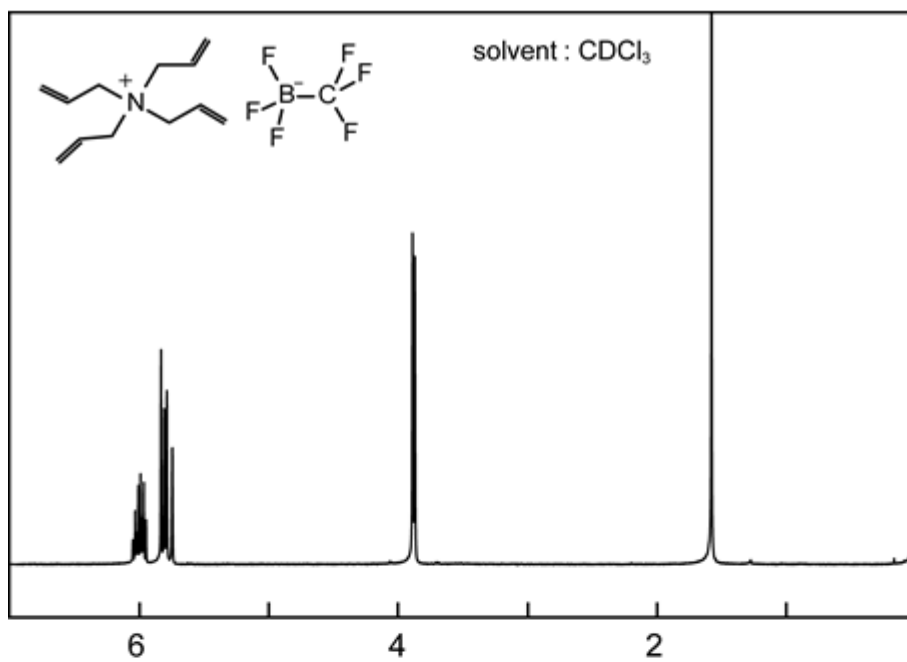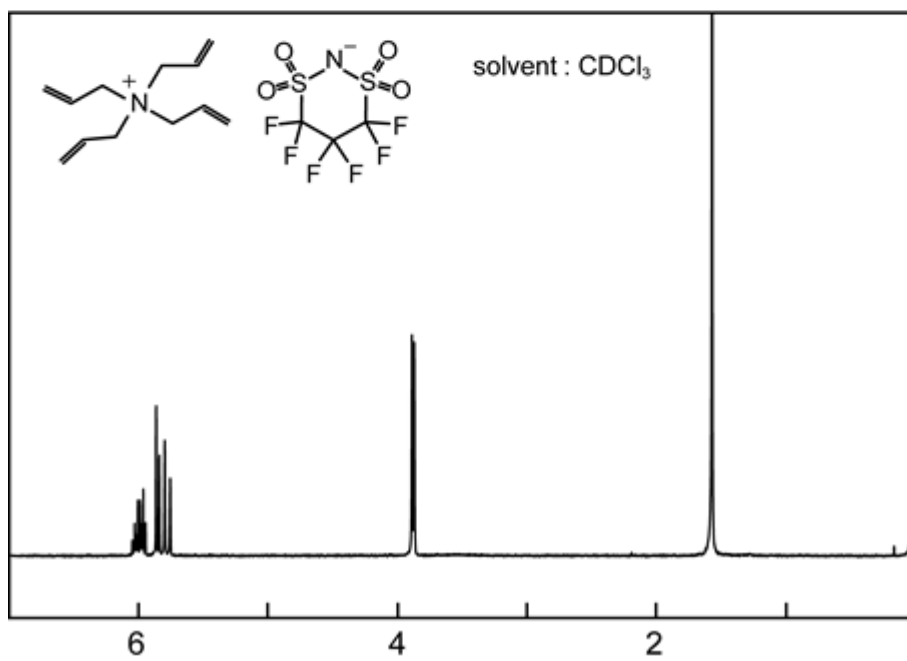

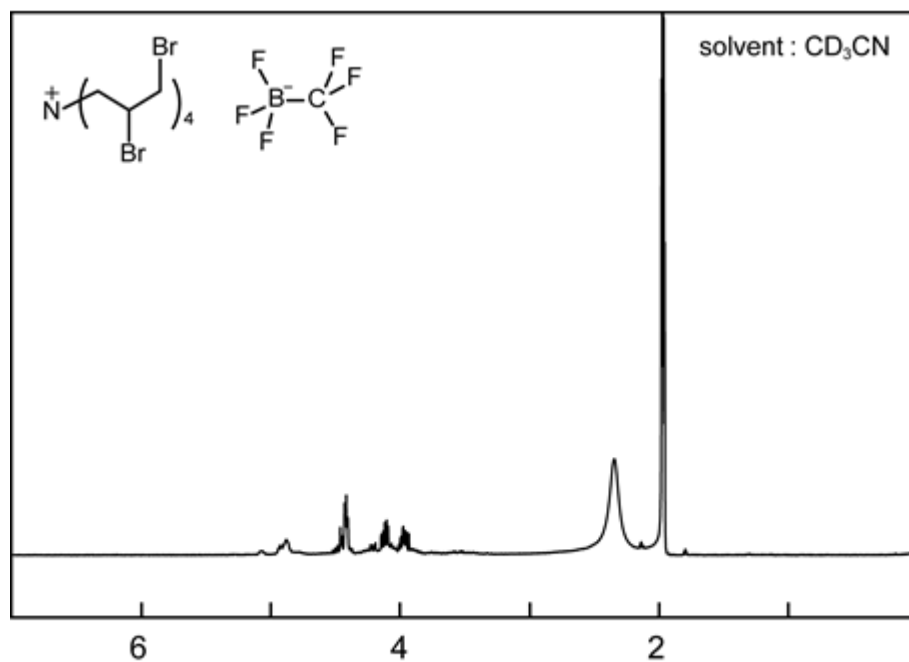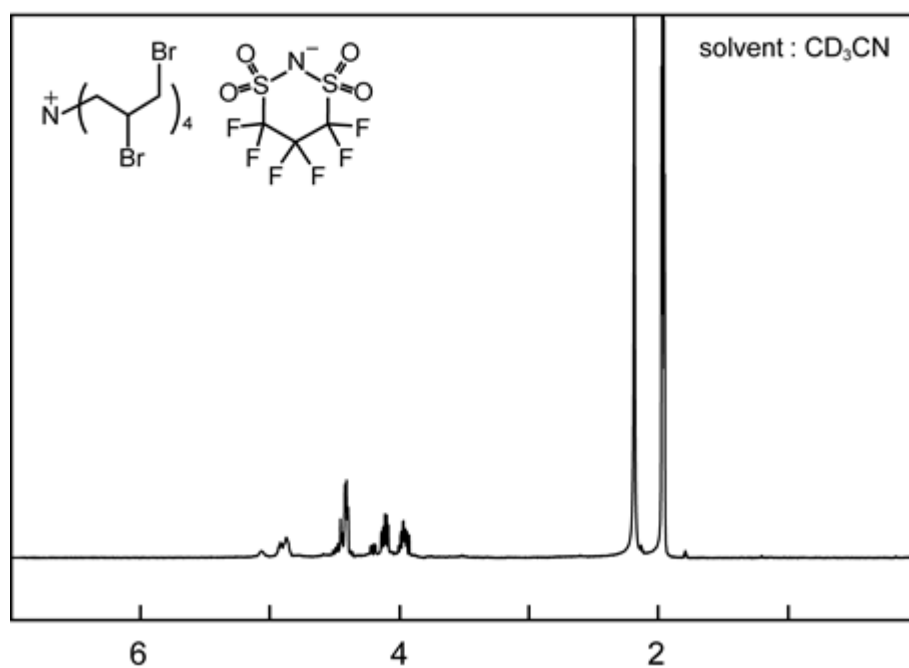

**Fig. S5.** <sup>1</sup>H NMR spectra of [1]X-[3]X and [1-Br]X-[3-Br]X, where X = CPFSA,) or CF<sub>3</sub>BF<sub>3</sub>.

**Table S1.** Cell parameters

|                            | [1]CF <sub>3</sub> BF <sub>3</sub> | [1]CPFSA         | [2]CF <sub>3</sub> BF <sub>3</sub> |
|----------------------------|------------------------------------|------------------|------------------------------------|
|                            | 193 K (Phase II)                   | 203 K (Phase II) | 273 K (Phase II)                   |
| Crystal system             | triclinic                          | orthorhombic     | monoclinic                         |
| <i>a</i> (Å)               | 12.31(2)                           | 24.63(13)        | 13.785(11)                         |
| <i>b</i> (Å)               | 14.45(2)                           | 9.69(9)          | 4.863(3)                           |
| <i>c</i> (Å)               | 7.840(14)                          | 5.92(6)          | 6.984(5)                           |
| $\alpha$ (°)               | 97.01(5)                           |                  |                                    |
| $\beta$ (°)                | 96.56(4)                           |                  | 90.66(4)                           |
| $\gamma$ (°)               | 110.97(5)                          |                  |                                    |
| <i>V</i> (Å <sup>3</sup> ) | 1273(4)                            | 1414(20)         | 468.2(6)                           |
| <i>Z</i> <sup>a)</sup>     | 4                                  | 4                | 1                                  |

a) Estimated from molecular volume.

**Table S2.** Crystallographic parameters

|                                                                                                                     | [2]CPFSA                                                                                    | [1-Br]CPFSA                                                                                                |
|---------------------------------------------------------------------------------------------------------------------|---------------------------------------------------------------------------------------------|------------------------------------------------------------------------------------------------------------|
| Empirical formula                                                                                                   | C <sub>12</sub> H <sub>20</sub> F <sub>6</sub> N <sub>2</sub> O <sub>4</sub> S <sub>2</sub> | C <sub>8</sub> H <sub>12</sub> Br <sub>2</sub> F <sub>6</sub> N <sub>2</sub> O <sub>4</sub> S <sub>2</sub> |
| Formula weight                                                                                                      | 434.42                                                                                      | 535.85                                                                                                     |
| Crystal system                                                                                                      | monoclinic                                                                                  | monoclinic                                                                                                 |
| Space group                                                                                                         | <i>C2/c</i>                                                                                 | <i>C2/c</i>                                                                                                |
| <i>a</i> / Å                                                                                                        | 23.447(6)                                                                                   | 31.144                                                                                                     |
| <i>b</i> / Å                                                                                                        | 10.992(3)                                                                                   | 7.460                                                                                                      |
| <i>c</i> / Å                                                                                                        | 17.992(7)                                                                                   | 16.328(7)                                                                                                  |
| $\beta$ / °                                                                                                         | 127.576(3)                                                                                  | 117.839(5)                                                                                                 |
| <i>V</i> / Å <sup>3</sup>                                                                                           | 3675(2)                                                                                     | 3355(2)                                                                                                    |
| <i>Z</i>                                                                                                            | 8                                                                                           | 8                                                                                                          |
| $\rho_{\text{calcd}}$ / g cm <sup>-3</sup>                                                                          | 1.57                                                                                        | 2.131                                                                                                      |
| <i>F</i> (000)                                                                                                      | 1792                                                                                        | 2096                                                                                                       |
| Reflns collected                                                                                                    | 10214                                                                                       | 9050                                                                                                       |
| Independent reflns                                                                                                  | 4189                                                                                        | 3824                                                                                                       |
| Parameters                                                                                                          | 238                                                                                         | 220                                                                                                        |
| <i>R</i> (int)                                                                                                      | 0.0586                                                                                      | 0.0461                                                                                                     |
| <i>R</i> <sub>1</sub> <sup><i>a</i></sup> , <i>R</i> <sub>w</sub> <sup><i>b</i></sup> ( <i>I</i> > 2σ ( <i>I</i> )) | 0.0498, 0.1017                                                                              | 0.0366, 0.0950                                                                                             |
| <i>R</i> <sub>1</sub> <sup><i>a</i></sup> , <i>R</i> <sub>w</sub> <sup><i>b</i></sup> (all data)                    | 0.0978, 0.1171                                                                              | 0.0495, 0.1006                                                                                             |
| Goodness of fit                                                                                                     | 1.009                                                                                       | 1.105                                                                                                      |
| $\Delta\rho_{\text{max,min}}$ [e Å <sup>-3</sup> ]                                                                  | 0.425, -0.615                                                                               | 2.272, -1.030                                                                                              |

$${}^a R_1 = \Sigma ||F_o| - |F_c|| / \Sigma |F_o|. \quad {}^b R_w = [\Sigma w (F_o^2 - F_c^2)^2 / \Sigma w (F_o^2)^2]^{1/2}.$$
